# Supplementary material for: When research does not synchronize: Comprehensive analyses show no mother–child physiological coupling
Source: Research Square preprint supplement (doi:10.21203/rs.3.rs-8479203/v1), 2026-01-07
Supplement: Supplementary file 1 [file 3617db98596ff3ea8c191b49.pdf]

1                   When research does not synchronize:  
2                   Comprehensive analyses show no mother–child  
3                   physiological coupling - Supplementary material

4                   Georgios Rousis<sup>1,2\*</sup>, Lisa Gistelinck<sup>1\*</sup>, Ward Deferm<sup>1</sup>,  
5                   Rowena Van den Broeck<sup>1</sup>, Bieke Bollen<sup>3</sup>, Sam Wass<sup>4</sup>,  
6                   Gunnar Naulaers<sup>3</sup>, Maarten De Vos<sup>2</sup>, Bart Boets<sup>1</sup>

7                   <sup>1\*</sup>Center for Developmental Psychiatry, KU Leuven, Herestraat 49,  
8                   Leuven, 3000, Belgium.

9                   <sup>2</sup>Department of Electrical Engineering, KU Leuven, Kasteelpark  
10                   Arenberg 10, Leuven, 3000, Belgium.

11                   <sup>3</sup>Department of Development and Regeneration, UZ Leuven,  
12                   Herestraat 49, Leuven, 3000, Belgium.

13                   <sup>4</sup>Developmental Psychology, University of East London, Water Lane,  
14                   London, E15 4L, United Kingdom.

15                   \*Corresponding author(s). E-mail(s): [georgios.rousis@kuleuven.be](mailto:georgios.rousis@kuleuven.be);  
16                   [lisa.gistelinck@kuleuven.be](mailto:lisa.gistelinck@kuleuven.be);

17                   Contributing authors: [ward.deferm@kuleuven.be](mailto:ward.deferm@kuleuven.be);  
18                   [rowena.vandenbroeck@kuleuven.be](mailto:rowena.vandenbroeck@kuleuven.be); [bieke.bollen@uzleuven.be](mailto:bieke.bollen@uzleuven.be);  
19                   [s.v.wass@uel.ac.uk](mailto:s.v.wass@uel.ac.uk); [gunnar.naulaers@kuleuven.be](mailto:gunnar.naulaers@kuleuven.be);  
20                   [maarten.devos@kuleuven.be](mailto:maarten.devos@kuleuven.be); [bart.boets@kuleuven.be](mailto:bart.boets@kuleuven.be);

21                   **Abstract**

22                   Biobehavioral synchrony refers to covariation in physiological signals between  
23                   interacting partners and is widely hypothesized to support co-regulation, bond-  
24                   ing, and early socio-emotional development. This assumption is particularly  
25                   salient for children born preterm, who often experience reduced early physical  
26                   contact and prolonged neonatal separation, potentially shaping later care-  
27                   giver–child attunement. Here we present a large-scale, systematic investigation of  
28                   mother–child physiological synchrony in 102 dyads (70 preterm 5-year-olds and  
29                   32 matched full-term controls). Heart rate was recorded across eight interaction  
30                   paradigms spanning passive viewing to face-to-face play. We applied the major

31 commonly used analytic approaches, combined with rigorous surrogate-data con-  
32 trols and multiverse analyses, to assess the robustness of synchrony estimates.  
33 Across all paradigms, metrics, and analytic variants, synchrony in real dyads  
34 never exceeded that observed in pair-shuffled or segment-shuffled surrogate data.  
35 Patterns were virtually identical in full-term and preterm groups, and no reliable  
36 variability in synchrony remained that could be related to indices of prematurity.  
37 Together, these findings challenge the view that autonomic synchrony is a robust  
38 or ubiquitous feature of early social interaction and reveal substantial method-  
39 ological fragility in current synchrony research. Our results underscore the need  
40 for more rigorous analytical frameworks and raise critical questions about when  
41 - and whether - physiological synchrony genuinely emerges in caregiver-child  
42 relationships.

43 **Keywords:** Physiological synchrony, Prematurity, Mother-child interactions,  
44 Multiverse analyses

# 1 Supplementary figures

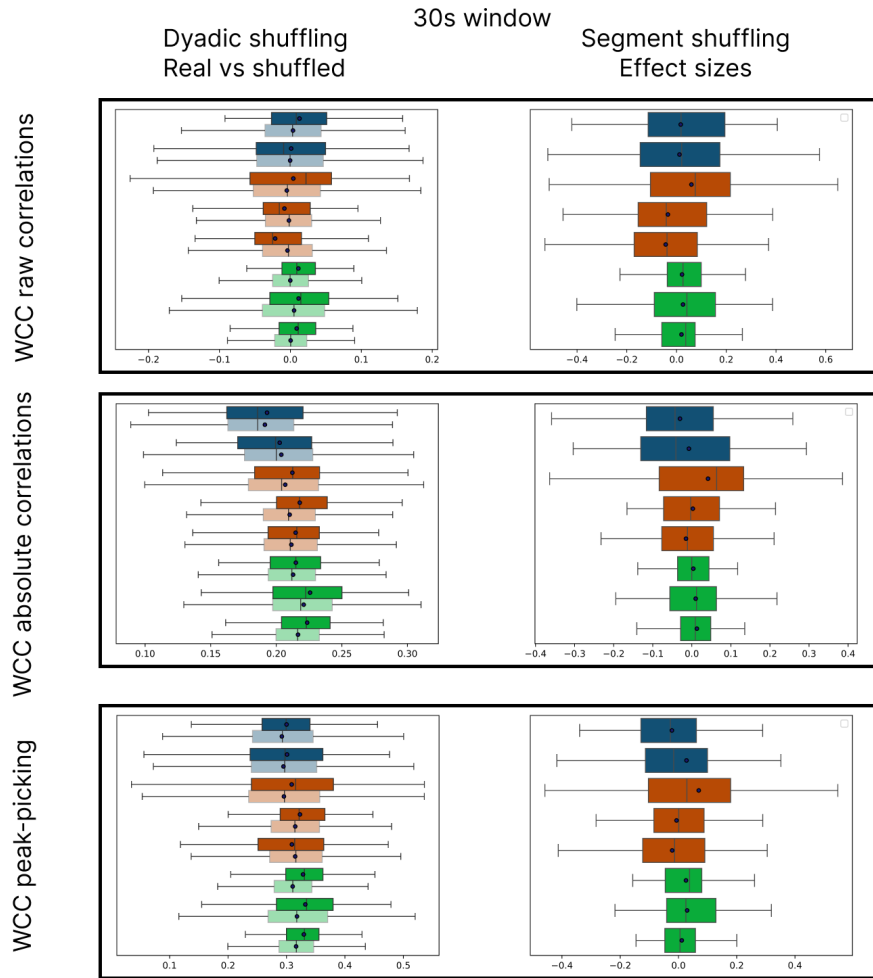

**Suppl. Figure 1a** Windowed time-lagged cross-correlations (WCC), computed using a 30 s sliding window with a 15 s time lag. Results are shown for the full sample across eight interaction conditions, grouped by interaction level (blue: no interaction; brown: box interaction; green: table interaction). The first column displays averaged raw correlations (A), absolute correlations (C), and peak-picking values (E) for real dyads (solid colors) and shuffled dyads (transparent color). The second column presents the corresponding effect sizes, quantifying differences between aligned and shuffled segments for each metric (B, D, F).

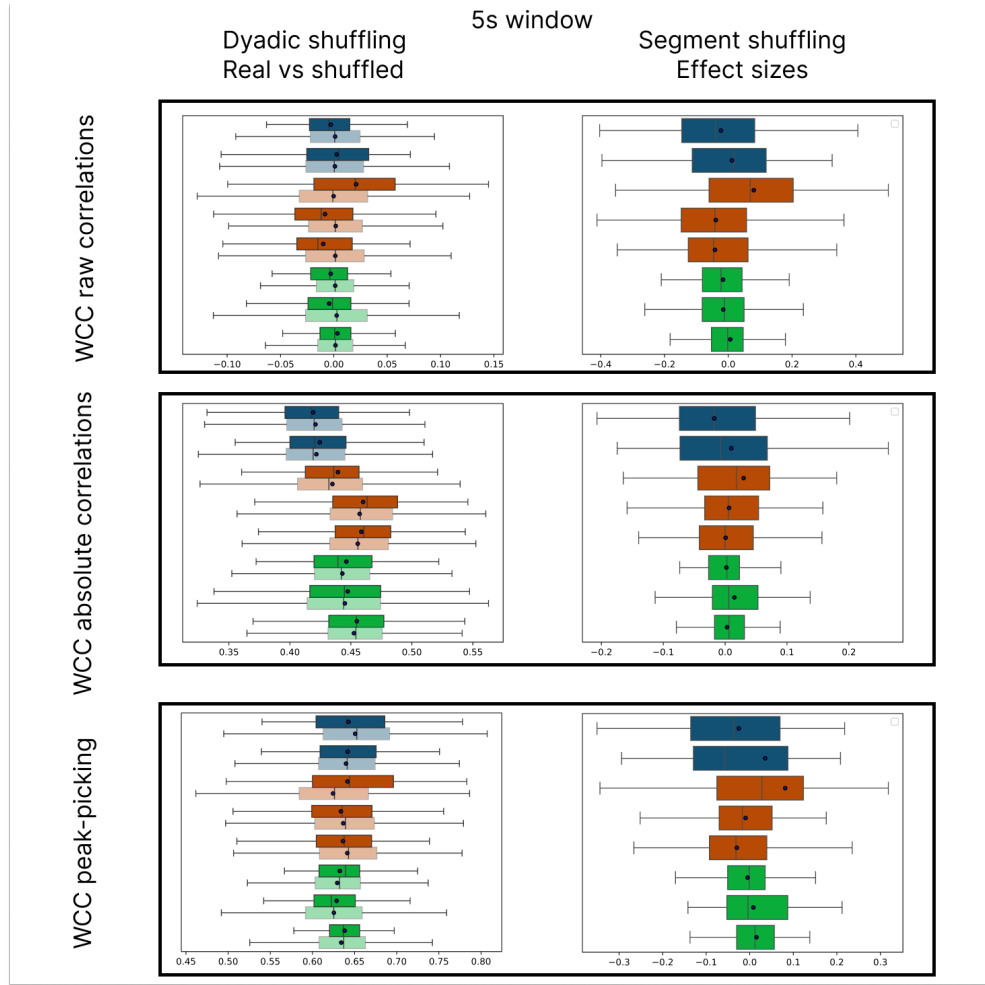

**Suppl. Figure 1b** Windowed time-lagged cross-correlations (WCC), computed using a 5s sliding window with a 2.5 s time lag. Results are shown for the full sample across eight interaction conditions, grouped by interaction level (blue: no interaction; brown: box interaction; green: table interaction). The first column displays averaged raw correlations (A), absolute correlations (C), and peak-picking values (E) for real dyads (solid colors) and shuffled dyads (transparent color). The second column presents the corresponding effect sizes, quantifying differences between aligned and shuffled segments for each metric (B, D, F).

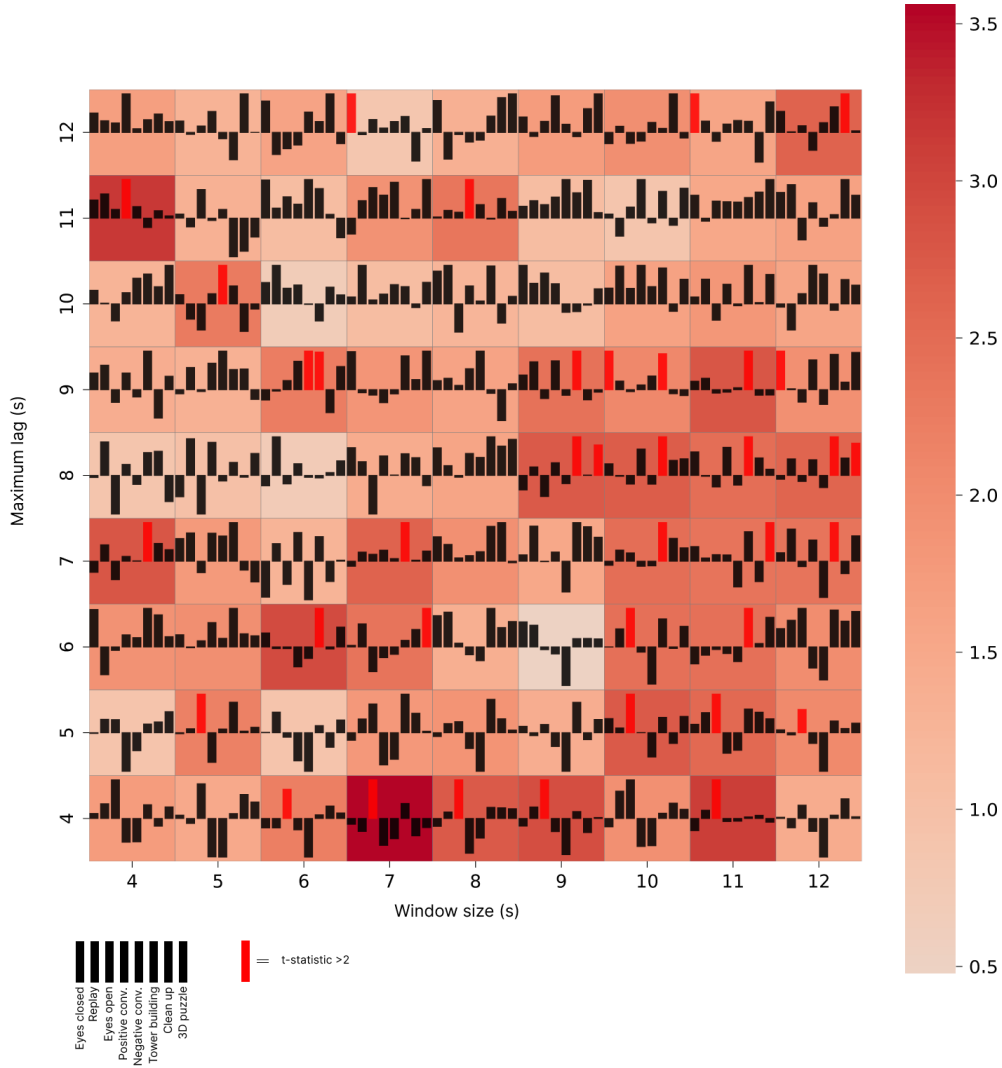

**Suppl. Figure 2** WCC synchrony across window sizes and time lags. Windowed cross-correlation (WCC) synchrony was evaluated across a parameter space comprising window sizes and maximum time lags ranging from 4 to 12 s. The figure displays two-sample t-statistics comparing real versus dyad-shuffled pairs across the full parameter space: (i) separately for each interaction condition (shown as black and red bar graphs within each cell), and (ii) averaged across the six real interaction conditions, excluding the eyes-closed and replay conditions (encoded by cell color). Each cell therefore contains bar graphs representing condition-specific t-statistics. Red bars indicate  $t > 2$ , and cell color reflects the maximum t-statistic observed across interaction conditions. Across the parameter space, synchrony patterns appeared largely random and unsystematic, and even the strongest effects remained well below the corrected significance threshold ( $t > 4$ ).

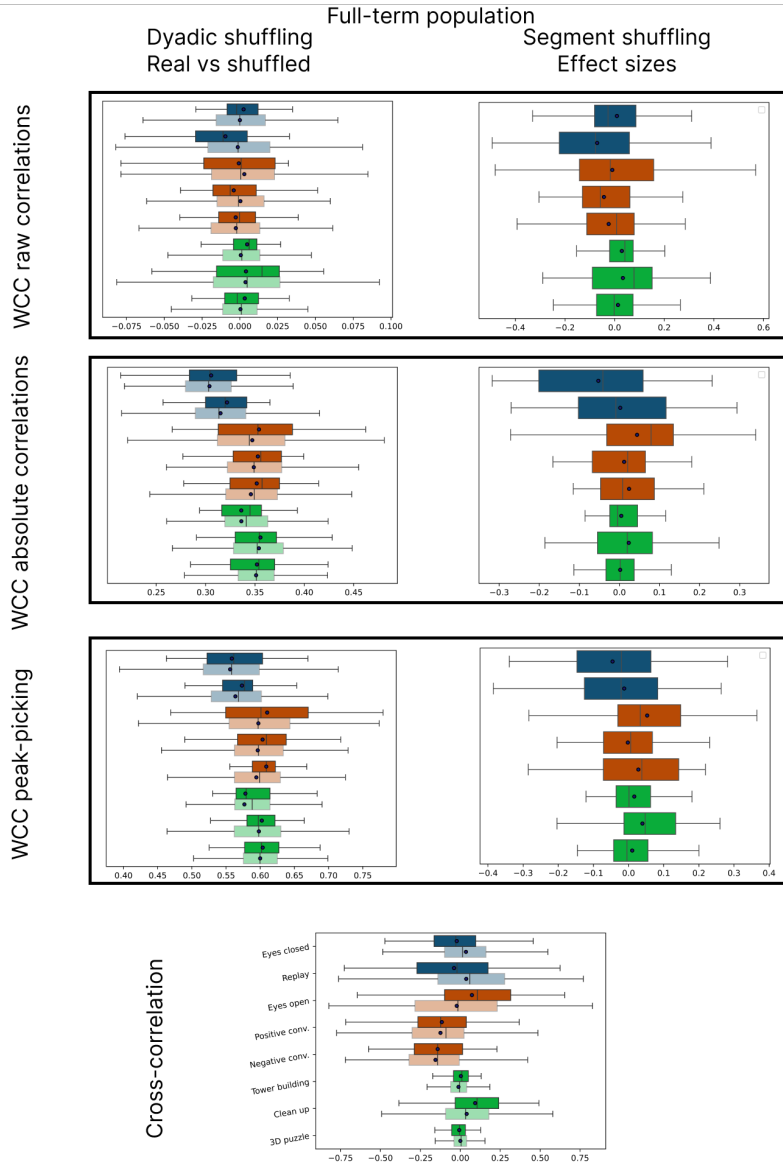

**Suppl. Figure 3a** Cross-correlation and windowed time-lagged cross-correlation (WCC) for the full-term sample. Results are shown for the full-term sample across eight interaction conditions, grouped by interaction level (blue: no interaction; brown: box interaction; green: table interaction). WCCs were computed using a 10 s sliding window with a 5 s time lag. The first column displays averaged raw correlations (A), absolute correlations (C), and peak-picking values (E) for real dyads (solid colors) and shuffled dyads (transparent color). The second column presents the corresponding effect sizes, quantifying differences between aligned and shuffled segments for each metric (B, D, F). The bottom row illustrates cross-correlations computed over the full duration of each condition for real and shuffled dyads (G).

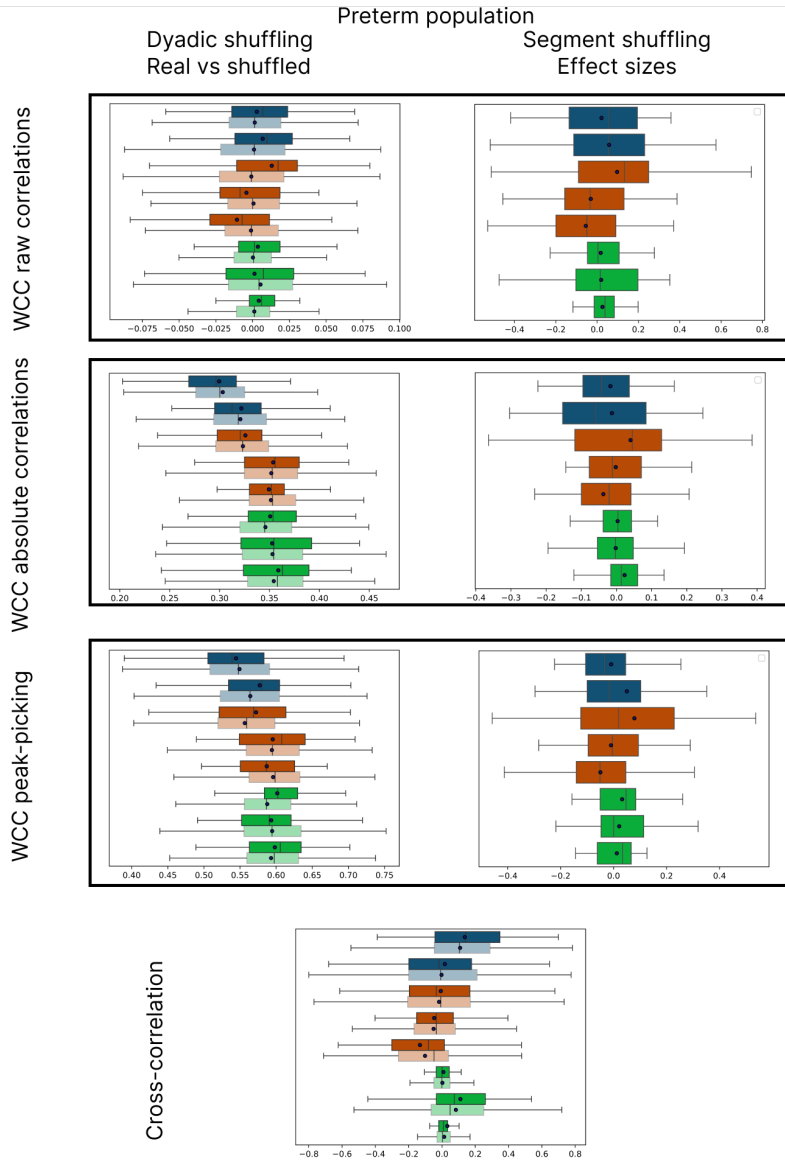

**Suppl. Figure 3b** Cross-correlation and windowed time-lagged cross-correlation (WCC) for the preterm sample. Results are shown for the preterm sample across eight interaction conditions, grouped by interaction level (blue: no interaction; brown: box interaction; green: table interaction). WCCs were computed using a 10 s sliding window with a 5 s time lag. The first column displays averaged raw correlations (A), absolute correlations (C), and peak-picking values (E) for real dyads (solid colors) and shuffled dyads (transparent color). The second column presents the corresponding effect sizes, quantifying differences between aligned and shuffled segments for each metric (B, D, F). The bottom row illustrates cross-correlations computed over the full duration of each condition for real and shuffled dyads (G).

## 2 Supplementary tables

**Suppl. Table 1** Interacting vs non-interacting conditions - Absolute correlation comparisons

|                | Eyes closed |                          | Replay      |                         |
|----------------|-------------|--------------------------|-------------|-------------------------|
|                | U-statistic | p-value                  | U-statistic | p-value                 |
| Eyes open      | 2328        | $2.164 \times 10^{-6}$   | 3482        | 0.082                   |
| Positive conv. | 1470        | $1.108 \times 10^{-13}$  | 2277        | $6.6231 \times 10^{-8}$ |
| Negative conv. | 1431        | $1.428 \times 10^{-12}$  | 2158        | $2.5185 \times 10^{-7}$ |
| Tower building | 1428        | $1.3523 \times 10^{-10}$ | 2180        | $2.2106 \times 10^{-5}$ |
| Clean up       | 1050        | $3.040 \times 10^{-11}$  | 1637        | $2.5687 \times 10^{-6}$ |
| 3D puzzle      | 1011        | $1.913 \times 10^{-12}$  | 1526        | $6.2056 \times 10^{-8}$ |

**Suppl. Table 2** Interacting vs non-interacting conditions - Peak-picking value comparisons

|                | Eyes closed |                        | Replay      |         |
|----------------|-------------|------------------------|-------------|---------|
|                | U-statistic | p-value                | U-statistic | p-value |
| Eyes open      | 3028        | 0.0069                 | 3482        | 0.5655  |
| Positive conv. | 2332        | $6.406 \times 10^{-7}$ | 3891        | 0.0033  |
| Negative conv. | 2100        | $4.030 \times 10^{-7}$ | 3167        | 0.0071  |
| Tower building | 1880        | $7.547 \times 10^{-7}$ | 2998        | 0.0044  |
| Clean up       | 1581        | $3.001 \times 10^{-6}$ | 2214        | 0.0089  |
| 3D puzzle      | 1531        | $2.360 \times 10^{-7}$ | 2186        | 0.0019  |

**Suppl. Table 3** P-values of statistical surrogate tests - 30s window with 15s maximum lag

| Condition      | Dyadic shuffling <sup>1</sup> |            |         | Segment shuffling <sup>2</sup> |            |        |
|----------------|-------------------------------|------------|---------|--------------------------------|------------|--------|
|                | Raw corr.                     | Abs. corr. | PP      | Raw corr.                      | Abs. corr. | PP     |
| Eyes closed    | 0.2212                        | 0.7576     | 0.3806  | 0.8519                         | 0.9311     | 0.9250 |
| Replay         | 0.9190                        | 0.8192     | 0.5598  | 0.9974                         | 0.9508     | 0.9868 |
| Eyes open      | 0.0974                        | 0.2065     | 0.2069  | 0.9336                         | 0.8919     | 0.9512 |
| Positive conv. | 0.2516                        | 0.0147*    | 0.1271  | 0.8689                         | 0.7943     | 0.9625 |
| Negative conv. | 0.0041*                       | 0.2280     | 0.5309  | 0.7129                         | 0.9123     | 0.9017 |
| Tower building | 0.0251*                       | 0.4460     | 0.0011* | 0.8060                         | 0.9610     | 0.7576 |
| Clean up       | 0.3458                        | 0.4474     | 0.1218  | 0.8537                         | 0.8281     | 0.7573 |
| 3D puzzle      | 0.0284*                       | 0.0310*    | 0.0265* | 0.8074                         | 0.6731     | 0.7682 |

<sup>1</sup>Comparison between real and shuffled data with Mann-Whitney U-tests.

<sup>2</sup>Comparison of effect sizes with 0 with one sample t-test.



**Suppl. Table 4** P-values of statistical surrogate tests - 5s window with 2.5s maximum lag

| Condition      | Dyadic shuffling <sup>1</sup> |            |         | Segment shuffling <sup>2</sup> |            |        |
|----------------|-------------------------------|------------|---------|--------------------------------|------------|--------|
|                | Raw corr.                     | Abs. corr. | PP      | Raw corr.                      | Abs. corr. | PP     |
| Eyes closed    | 0.2426                        | 0.5531     | 0.1869  | 0.8984                         | 0.8538     | 0.8663 |
| Replay         | 0.6197                        | 0.4738     | 0.9905  | 0.9583                         | 0.9533     | 0.9476 |
| Eyes open      | 0.0001*                       | 0.4715     | 0.0236* | 0.7241                         | 0.8678     | 0.8708 |
| Positive conv. | 0.0116*                       | 0.3805     | 0.7074  | 0.8175                         | 0.9223     | 0.9372 |
| Negative conv. | 0.0164*                       | 0.5043     | 0.3550  | 0.7793                         | 0.9895     | 0.7733 |
| Tower building | 0.0750                        | 0.6271     | 0.4239  | 0.8587                         | 0.9633     | 0.9403 |
| Clean up       | 0.2255                        | 0.7690     | 0.7978  | 0.9041                         | 0.8137     | 0.9357 |
| 3D puzzle      | 0.9385                        | 0.6048     | 0.5416  | 0.9497                         | 0.9384     | 0.8328 |

<sup>1</sup>Comparison between real and shuffled data with Mann-Whitney U-tests.<sup>2</sup>Comparison of effect sizes with 0 with one sample t-test.**Suppl. Table 5** P-values of statistical surrogate tests - Full-term population

| Condition      | Dyadic shuffling <sup>1</sup> |           |            |        | Segment shuffling <sup>2</sup> |            |        |
|----------------|-------------------------------|-----------|------------|--------|--------------------------------|------------|--------|
|                | CC                            | Raw corr. | Abs. corr. | PP     | Raw corr.                      | Abs. corr. | PP     |
| Eyes closed    | 0.1033                        | 0.7657    | 0.7404     | 0.7783 | 0.9636                         | 0.7224     | 0.8008 |
| Replay         | 0.2106                        | 0.118     | 0.2902     | 0.3879 | 0.7554                         | 0.9892     | 0.9424 |
| Eyes open      | 0.0570                        | 0.6080    | 0.5527     | 0.5699 | 0.9682                         | 0.7885     | 0.8017 |
| Positive conv. | 0.9488                        | 0.2496    | 0.6118     | 0.4104 | 0.8125                         | 0.9017     | 0.9839 |
| Negative conv. | 0.6692                        | 0.9160    | 0.3679     | 0.2567 | 0.8829                         | 0.8018     | 0.8427 |
| Tower building | 0.3470                        | 0.2425    | 0.9581     | 0.8480 | 0.7862                         | 0.9420     | 0.8267 |
| Clean up       | 0.1519                        | 0.6879    | 0.8608     | 0.6440 | 0.8679                         | 0.8330     | 0.7860 |
| 3D puzzle      | 0.4350                        | 0.7888    | 0.7797     | 0.8144 | 0.9253                         | 0.9798     | 0.9221 |

<sup>1</sup>Comparison between real and shuffled data with Mann-Whitney U-tests.<sup>2</sup>Comparison of effect sizes with 0 with one sample t-test.

**Suppl. Table 6** P-values of statistical surrogate tests - Preterm population

| Condition      | Dyadic shuffling <sup>1</sup> |           |            |        | Segment shuffling <sup>2</sup> |            |        |
|----------------|-------------------------------|-----------|------------|--------|--------------------------------|------------|--------|
|                | CC                            | Raw corr. | Abs. corr. | PP     | Raw corr.                      | Abs. corr. | PP     |
| Eyes closed    | 0.5157                        | 0.4762    | 0.2299     | 0.5038 | 0.9247                         | 0.9096     | 0.9637 |
| Replay         | 0.9368                        | 0.1408    | 0.8972     | 0.3218 | 0.8378                         | 0.9567     | 0.9111 |
| Eyes open      | 0.6426                        | 0.0013*   | 0.9266     | 0.3651 | 0.7106                         | 0.8937     | 0.8589 |
| Positive conv. | 0.7953                        | 0.2715    | 0.7252     | 0.8519 | 0.8862                         | 0.9822     | 0.9468 |
| Negative conv. | 0.2427                        | 0.0554    | 0.6100     | 0.1383 | 0.7903                         | 0.7274     | 0.7459 |
| Tower building | 0.6699                        | 0.3278    | 0.3518     | 0.0321 | 0.9006                         | 0.9559     | 0.7888 |
| Clean up       | 0.5211                        | 0.7918    | 0.8914     | 0.7008 | 0.9280                         | 0.9840     | 0.8758 |
| 3D puzzle      | 0.5789                        | 0.0970    | 0.3904     | 0.6667 | 0.7881                         | 0.7046     | 0.8821 |

<sup>1</sup>Comparison between real and shuffled data with Mann-Whitney U test.<sup>2</sup>Comparison of effect sizes with 0 with one sample t-test.**Suppl. Table 7** Full-term vs preterm - Effect size comparisons

| Condition      | Raw corr. |         | Abs corr. |         | PP     |         |
|----------------|-----------|---------|-----------|---------|--------|---------|
|                | U-stat    | p-value | U-stat    | p-value | U-stat | p-value |
| Eyes closed    | 799       | 0.5644  | 773       | 0.4187  | 829    | 0.7579  |
| Replay         | 636       | 0.0184* | 1024      | 0.3404  | 869    | 0.7163  |
| Eyes open      | 733       | 0.063   | 1072      | 0.3606  | 986    | 0.8344  |
| Positive conv. | 963       | 0.7260  | 1096      | 0.4908  | 1038   | 0.8163  |
| Negative conv. | 971       | 0.5181  | 1150      | 0.0278* | 1169   | 0.0180* |
| Tower building | 797       | 0.6567  | 758       | 0.9561  | 667    | 0.3987  |
| Clean up       | 537       | 0.9487  | 607       | 0.4109  | 618    | 0.3352  |
| 3D puzzle      | 509       | 0.3100  | 460       | 0.1087  | 548    | 0.5446  |
